## MEMBRANE PERMEABILITY AND UTILIZATION OF L-LACTATE AND PYRUVATE IN CARP RED BLOOD CELLS

KIRSTI TIIHONEN and MIKKO NIKINMAA

*Department of Zoology, Division of Physiology, PO Box 17, SF-00014 University of  
Helsinki, Finland*

*Accepted 2 February 1993*

### Summary

L-Lactate and pyruvate permeability and utilization in carp (*Cyprinus carpio*) red blood cells was studied *in vitro* with tracer methods. Transport of lactate and pyruvate across the carp red blood cell membrane is rapid. At low plasma concentrations, lactate and pyruvate are transported into carp red blood cells mainly *via* a specific monocarboxylate carrier. This is shown by a study of the saturation kinetics and by inhibition using  $\alpha$ -cyano-4-hydroxycinnamic acid and, more powerfully, *p*-chloromercuriphenylsulphonic acid. At higher plasma concentrations both simple diffusion and, apparently, the band 3 anion exchange system become increasingly important transport pathways. Carbon dioxide production rates from lactate and pyruvate as a function of their extracellular concentrations showed saturation kinetics. The transport rates of lactate and pyruvate are considerably higher than those required for their maximal rate of oxidation. The rapid transport of lactate and pyruvate into carp red blood cells thus guarantees that substrate availability is not the rate-limiting factor for the oxidation of these substrates.

### Introduction

Transport studies of L-lactate and pyruvate in vertebrate cells have been limited mainly to red blood cells of mammalian origin. L-Lactate and pyruvate may enter the mammalian erythrocyte by three mechanisms: by free diffusion of the undissociated acid, by the band 3 anion exchanger or *via* a specific monocarboxylate carrier. The latter mechanism dominates at physiological concentrations in most species studied, although the carrier is absent in sheep and ox erythrocytes (Deuticke *et al.* 1978). Data are available on the transport of lactate into the red blood cells of only one non-mammalian species: it appears that the transport of lactate into the erythrocytes of the tuna, *Katsuwonus pelamis*, occurs by simple diffusion (Moon *et al.* 1987).

The component of transport mediated by the monocarboxylate carrier can be distinguished from others by its sensitivity to certain sulphhydryl reagents, particularly *p*-chloromercuriphenylsulphonic acid (PCMBS) (Deuticke *et al.* 1978).  $\alpha$ -Cyanocinnamates have also been used for this purpose (Halestrap and Denton, 1974;

Key words: carp, *Cyprinus carpio*, red blood cell, monocarboxylate transport, lactate, pyruvate, metabolism.

Halestrap, 1976), although they are also known to inhibit the band-3-mediated transport (Halestrap, 1976; Deuticke, 1982). Monocarboxylate transport *via* the band 3 anion exchange system is difficult to study, because most band 3 anion exchange inhibitors also affect the specific monocarboxylate carrier (Deuticke *et al.* 1982; Jennings and Adams-Lackey, 1982; Poole and Halestrap, 1991).

Fish erythrocytes appear to produce energy by mainly aerobic means (e.g. Eddy, 1977; Ferguson and Boutilier, 1988; Ferguson *et al.* 1989; Sephton *et al.* 1991). L-Lactate and pyruvate appear to be the most important oxidative energy substrates of carp erythrocytes (Tiihonen and Nikinmaa, 1991). Thus, monocarboxylate transport may be one of the control steps in energy production. For this reason we have investigated the mechanisms of lactate and pyruvate transport into carp erythrocytes. We have also investigated the concentration dependence of L-lactate and pyruvate oxidation rates and compared these to the transport rates of L-lactate and pyruvate. Thus, we have been able to evaluate the role of monocarboxylate transport in the control of metabolic energy production.

## Materials and methods

### *Animals and handling of blood*

The carp, *Cyprinus carpio* L., were obtained from Porla Fisheries Station and maintained under laboratory conditions (in running, dechlorinated Helsinki tapwater at 12–17°C) for a minimum of 10 days before experimentation. One group of carp used in the lactate and pyruvate utilization experiments had been maintained in laboratory conditions for a year. Fish were fed on a commercial diet, but were fasted for 24–96 h before use. Animals were anaesthetized with MS-222 (0.1 g l<sup>-1</sup>, 5 min) and the blood samples were taken by venipuncture.

Red blood cells (RBCs) and plasma were separated by a short centrifugation (10000 g). Cells were prepared for transport experiments by washing three times with an iso-osmotic incubation medium containing (in mmol l<sup>-1</sup>): 128 NaCl, 3 KCl, 1.5 CaCl<sub>2</sub>, 1.5 MgCl<sub>2</sub>, 15 Tris. Earlier studies (e.g. Bushnell *et al.* 1985; Salama and Nikinmaa, 1988) have shown that cellular nucleotide triphosphate concentrations remain stable in such incubation media for several hours. Washing the red cells removes intracellular pyruvate and lactate. The buffy coat was discarded and the washed red cells were resuspended to a haematocrit (Hct) of 20% in incubation medium or 10% in medium containing inhibitor. The pH of the incubation medium was initially adjusted to 7.8. During the experiments, the pH of the medium remained quite stable, except in the highest PCMBS and  $\alpha$ -cyanocinnamate concentrations tested in dose–response experiments, where the pH decreased by approximately 0.1–0.2 units. All the experiments were carried out, under air, at room temperature (21±1°C) unless otherwise stated.

### *Transport studies*

Uptake of L-lactate and pyruvate was measured using the modified oil-stop procedure (Young and Ellory, 1982). Uptake of <sup>14</sup>C-labelled L-lactate and pyruvate was initiated by mixing the cell suspension (Hct 20%) with an equal volume of incubation medium containing labelled substrate. In dose–response studies with inhibitors, the ratio of cell

suspension (Hct 10%) to medium containing labelled substrate was 9:1 (v:v), but final incubations, in both cases, contained  $^{14}\text{C}$ -labelled substrate at an activity of approximately  $18.5\text{ kBq ml}^{-1}$ . In the inhibition studies, a preincubation period of at least 1 h with the inhibitor (PCMBS or  $\alpha$ -cyanocinnamate) preceded the uptake experiment, which was carried out as described above. Fresh stock solutions of PCMBS and  $\alpha$ -cyanocinnamate were prepared daily.

Incubations were stopped at pre-determined times by transferring 0.2 ml of the cell suspension (10% Hct) to an Eppendorf tube containing 0.8 ml of stop medium layered on top of 0.5 ml of dibutyl phthalate. Initial rates of lactate and pyruvate uptake were determined from the first 30 s of incubation, during which the uptake was linear. The stopping medium, containing  $0.5\text{ mmol l}^{-1}$  PCMBS in incubation medium, was prepared daily. The tube was centrifuged immediately ( $10000\text{ g}$  for 10 s at  $4^\circ\text{C}$ ) and stored on ice to minimize metabolism. The medium and oil layers were removed by suction, leaving the cell pellet at the bottom of the tube. After carefully wiping the inside of the tube, the cell pellet was lysed with 0.2 ml of  $0.6\text{ mmol l}^{-1}$  perchloric acid. The radioactivity taken up by the red blood cells was measured by liquid scintillation counting (LKB-Wallac 1211 MiniBeta). A correction factor for the radioactivity trapped in the extracellular space was estimated using ice-cold cell samples which were mixed with ice-cold labelled substrate and centrifuged immediately. Uptake values were calculated after subtraction of these 'blank' estimates. Intracellular substrate concentrations are presented as  $\text{mmol l}^{-1}$  RBC.

L-[U- $^{14}\text{C}$ ]lactic acid sodium salt ( $5.69\text{ GBq mmol}^{-1}$ ) and [1- $^{14}\text{C}$ ]pyruvic acid sodium salt ( $1.07\text{ GBq mmol}^{-1}$ ) were obtained from Amersham International. Non-radioactive pyruvate was from Merck and non-radioactive L-lactate from Sigma, as were  $\alpha$ -cyano-4-hydroxycinnamic acid and *p*-chloromercuriphenylsulphonic acid (PCMBS).

#### *Kinetic analyses*

The rate constants were calculated using the equation:

$$U_t = U_{\text{tot}}(1 - e^{-kt}),$$

where  $U_t$  is the substrate uptake at time  $t$ ,  $U_{\text{tot}}$  is the total uptake of substrate at equilibrium and  $k$  is the rate constant.

Kinetic variables are determined using the Michaelis–Menten equation modified to include a diffusional component:

$$V = V_{\text{max}}s/(K_m + s) + Ds,$$

where  $V$  is the initial uptake rate,  $V_{\text{max}}$  is the maximum influx through the transport system,  $s$  is the substrate concentration,  $K_m$  is the apparent half-saturation constant of the transport system and  $D$  is the diffusional constant. To ensure that the initial rate of substrate entry was being measured, preliminary investigations of the time course of uptake were performed.

#### *Measurement of plasma and RBC lactate, pyruvate and $\text{Cl}^-$ concentrations*

Blood samples for plasma and RBC lactate, pyruvate and  $\text{Cl}^-$  concentration measurements were taken by venipuncture as previously described. Plasma and RBCs

were separated by centrifugation at 10000g for 1min. RBC fractions were lysed with 0.6mmol l<sup>-1</sup> perchloric acid. Both fractions were immediately frozen prior to measurements. Pyruvate and lactate concentration measurements were based on absorbance changes at 340nm by means of LDH and NAD<sup>+</sup>/NADH conversions. One mole of NAD<sup>+</sup> is reduced to one mole of NADH for each mole of lactate present in assay tube and correspondingly NADH is oxidized to NAD<sup>+</sup> in pyruvate measurements. The fluorescence of NADH was measured using a Transcon 102 FN analyzer. Cl<sup>-</sup> concentrations were measured with a Radiometer CMT10 chloride titrator. Intracellular substrate concentrations are presented as mmol l<sup>-1</sup> RBCwater.

#### *Measurement of CO<sub>2</sub> production*

Carbon dioxide production from L-[U-<sup>14</sup>C]lactic acid sodium salt (5.69GBqmmol<sup>-1</sup>) and [1-<sup>14</sup>C]pyruvic acid (1.18GBqmmol<sup>-1</sup>) was measured as described previously (Tiihonen and Nikinmaa, 1991). Instead of a single substrate concentration, we measured a wide range of concentrations while maintaining the amount of labelled substrate at a constant level by adding additional unlabelled substrate to the incubation medium. During the 1h incubation, the pH of the medium remained quite stable at pH7.6. As the carbon dioxide production from these substrates showed saturation kinetics, we estimated the kinetic variables using the Michaelis–Menten equation.

### **Results and discussion**

The time courses of lactate and pyruvate uptake by carp RBCs are shown in Figs 1 and 2. The rate constant of 1mmol l<sup>-1</sup> lactate uptake was 0.038±0.011min<sup>-1</sup> and that for 0.05mmol l<sup>-1</sup> pyruvate was 0.232±0.048min<sup>-1</sup> (mean ± s.e.m., N=4). As can be seen from the insets, the uptake for both substrates remained linear for approximately 30s, and this incubation period was used to measure the initial rates of uptake. The tracer fluxes observed in these time course studies, especially in the case of pyruvate, may be affected by metabolic modification of the labelled substrates inside the red blood cell.

In physiological situations, the lactate concentration in the plasma, as well as in RBCs, exceeds the pyruvate concentration. The mean plasma lactate concentration of the carp in this study was 4.27±0.48mmol l<sup>-1</sup> while that of the RBCs was 3.02±0.37mmol l<sup>-1</sup> RBCwater (mean ± s.e.m., N=6). For pyruvate, corresponding concentrations were 0.082±0.003mmol l<sup>-1</sup> for plasma and 0.101±0.003mmol l<sup>-1</sup> RBCwater for RBCs (N=6). Because of the sampling procedure, these concentrations cannot be considered as resting plasma concentrations. The ratio of intracellular to plasma lactate concentration was 0.71, whereas the same ratio for pyruvate was 1.23. These RBC/plasma ratios are higher than the measured chloride distribution ratio (0.61; Cl<sup>-</sup> concentration: red blood cell 74.0±1.55mmol l<sup>-1</sup> RBCwater and plasma 121±0.58mmol l<sup>-1</sup>, mean ± s.e.m., N=4). Thus, either the uptake of pyruvate and, to a smaller extent, lactate into the carp red cells is concentrative or these anions are, to a significant extent, bound to intracellular proteins such as haemoglobin.

Figs 3 and 4 show full dose–response curves for the inhibition of lactate and pyruvate uptake by PCMBS and α-cyanocinnamate, respectively. The extent of inhibition of the

initial rate of  $1\text{mmol l}^{-1}$  lactate and  $0.05\text{mmol l}^{-1}$  pyruvate uptake depended strongly on inhibitor concentration. The sensitivity of pyruvate and lactate transport to inhibition by PCMBs is quite similar. Half-maximal inhibition was achieved at a concentration of  $2.3 \times 10^{-5}\text{mol l}^{-1}$  in both cases. PCMBs sensitivity of lactate transport in carp red blood cells is similar to that in human red blood cells (Deuticke *et al.* 1978). Monocarboxylate transport was also inhibited by  $\alpha$ -cyanocinnamate, although the inhibition was weaker

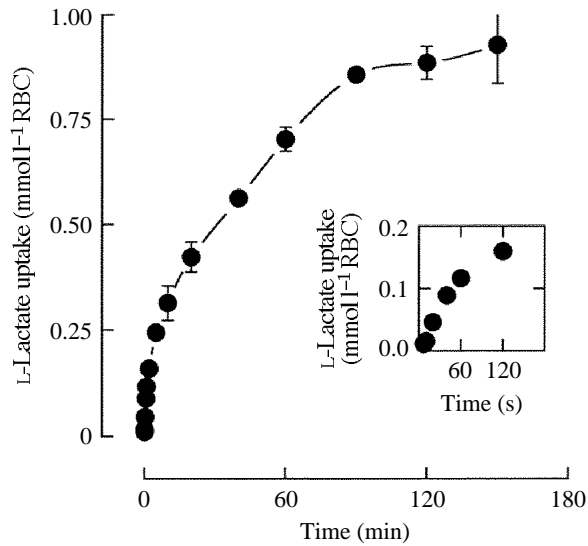

Fig. 1. Time course of uptake of  $1\text{mmol l}^{-1}$  L-lactate by carp red blood cells. Each value is the mean  $\pm$  S.E.M. of four experiments. Inset: L-lactate uptake at short times.

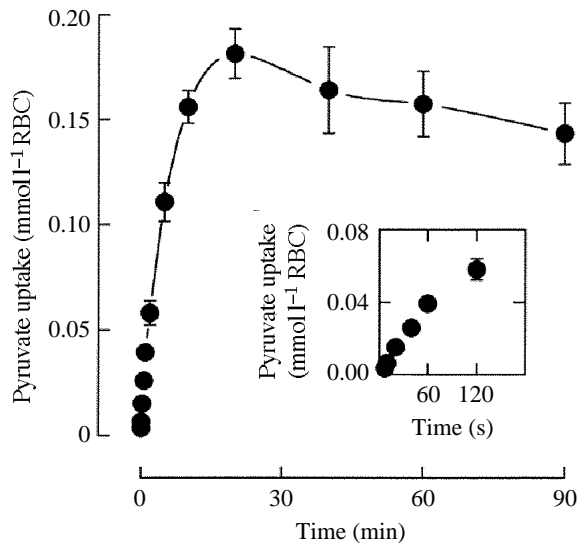

Fig. 2. Time course of uptake of  $0.05\text{mmol l}^{-1}$  pyruvate by carp red blood cells. Each value is the mean  $\pm$  S.E.M. of four experiments. Inset: pyruvate uptake at short times.

than that caused by PCMBS: the concentrations required for 50% inhibition of pyruvate and lactate uptake by  $\alpha$ -cyanocinnamate were 0.47 and 0.93 mmol l<sup>-1</sup>, respectively.

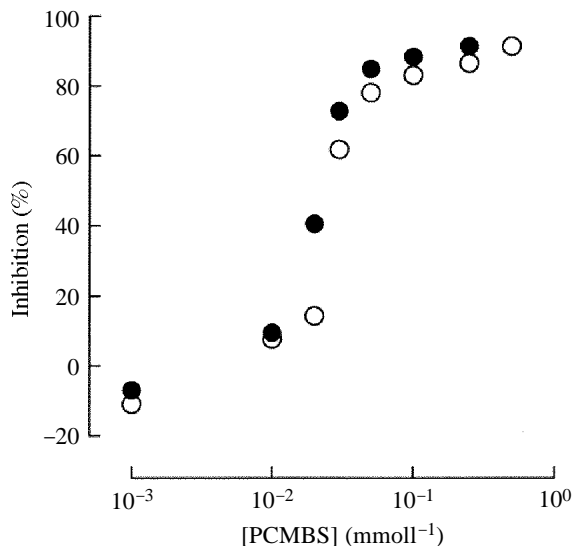

Fig. 3. Effects of PCMBS on uptake of 0.05 mmol l<sup>-1</sup> pyruvate (filled circles) and 1 mmol l<sup>-1</sup> L-lactate (open circles) by carp red blood cells. Results are given as a percentage of the control uptake rate in the absence of inhibitor. Values are means of four pyruvate experiments and 3–6 L-lactate experiments.

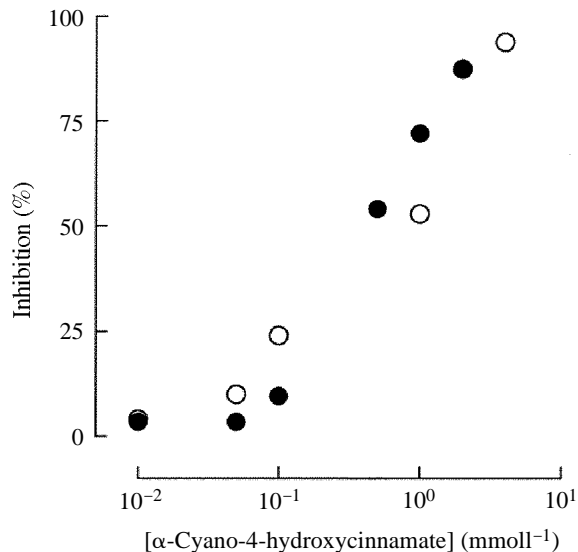

Fig. 4. Effects of  $\alpha$ -cyano-4-hydroxycinnamate on uptake of 0.05 mmol l<sup>-1</sup> pyruvate (filled circles) and 1 mmol l<sup>-1</sup> L-lactate (open circles) by carp red blood cells. Results are given as a percentage of the control uptake rate in the absence of inhibitor. Values are means of four experiments, except for pyruvate uptake at 0.5 mmol l<sup>-1</sup> inhibitor concentration, which is the mean of duplicate determinations.

Essentially complete (90%) inhibition of lactate and pyruvate uptake were caused by  $2\text{mmol l}^{-1}$   $\alpha$ -cyanocinnamate and  $0.25\text{mmol l}^{-1}$  PCMBS. Since the inhibition characteristics for lactate and pyruvate were similar, and since pyruvate uptake is inhibited by excess lactate (a 20-fold concentration of cold lactate inhibits pyruvate transport by 28%; K. Tiihonen, unpublished results), it is likely that the monocarboxylates share a common carrier molecule.

The concentration dependence of lactate and pyruvate uptake in the presence and absence of PCMBS is shown in Figs 5 and 6, respectively. Transport can be dissected into inhibitor-sensitive and inhibitor-insensitive components. The inhibitor-sensitive component of lactate and pyruvate uptake represents transport *via* the monocarboxylate carrier. The carrier tends to favour pyruvate over lactate, since the apparent half-saturation constant ( $K_m$ ) for lactate was slightly higher ( $2.76\text{mmol l}^{-1}$ ) than that for pyruvate ( $2.14\text{mmol l}^{-1}$ ). The  $K_m$  value for lactate is within the physiological range for the lactate concentration in carp plasma. The maximum influxes through the transport system ( $V_{\text{max}}$ ) for lactate ( $0.377\text{mmol l}^{-1}\text{RBCmin}^{-1}$ ) and pyruvate ( $0.627\text{mmol l}^{-1}\text{RBCmin}^{-1}$ ) by the carp RBC are quite similar, as would be expected if they share a common carrier. In the presence of the inhibitor, the relationship between the initial uptake rate and substrate concentration is linear, showing the diffusional

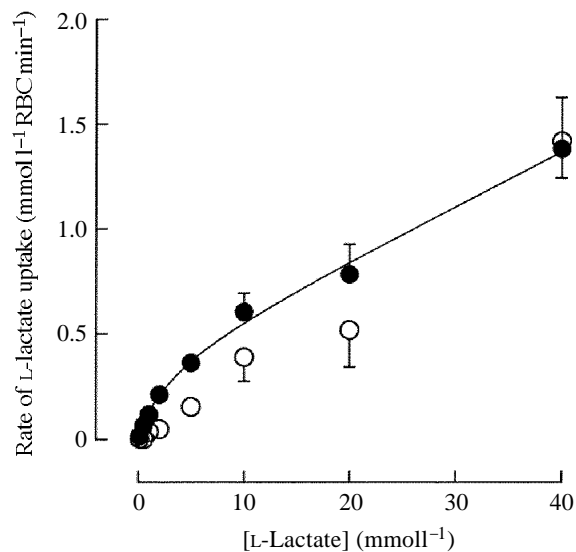

Fig. 5. Concentration dependence of L-lactate uptake by carp red blood cells in the absence (filled circles) and in the presence (open circles) of  $0.5\text{mmol l}^{-1}$  PCMBS. Each value is the mean  $\pm$  S.E.M. of four experiments, except for the values at  $40\text{mmol l}^{-1}$  L-lactate concentration, which are the means of three experiments. Lactate uptake during the first 30 s of incubation was measured as described in Materials and methods. In the absence of inhibitor, the apparent  $K_m$  and  $V_{\text{max}}$  values (determined by the Michaelis–Menten equation including diffusional component) are  $2.76\text{mmol l}^{-1}$  and  $0.377\text{mmol l}^{-1}\text{RBCmin}^{-1}$ . The slope (i.e. influx/extracellular substrate concentration) for the linear part of the uptake is  $0.025\text{mmol l}^{-1}\text{RBCmin}^{-1}(\text{mmol l}^{-1})^{-1}$ . In the presence of inhibitor, results were fitted by linear regression, yielding the slope  $0.034\text{mmol l}^{-1}\text{RBCmin}^{-1}(\text{mmol l}^{-1})^{-1}$ .

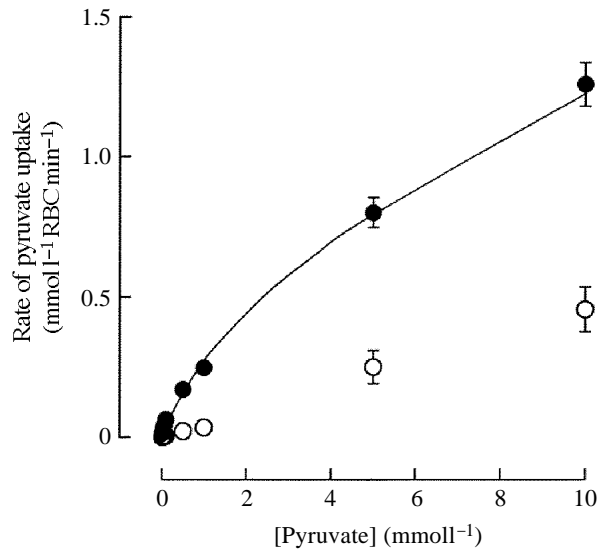

Fig. 6. Concentration dependence of pyruvate uptake by carp red blood cells in the absence (filled circles) and in the presence (open circles) of  $0.25 \text{ mmol l}^{-1}$  PCMBS. Each value is the mean  $\pm$  S.E.M. of three experiments. Pyruvate uptake over the first 30s of incubation was measured as described in Materials and methods. In the absence of inhibitor the apparent  $K_m$  and  $V_{max}$  values (determined by the Michaelis–Menten equation including diffusional component) are  $2.14 \text{ mmol l}^{-1}$  and  $0.627 \text{ mmol l}^{-1} \text{ RBC min}^{-1}$ . The slope (i.e. influx/extracellular substrate concentration) for the linear part of the uptake is  $0.071 \text{ mmol l}^{-1} \text{ RBC min}^{-1} (\text{mmol l}^{-1})^{-1}$ . In the presence of inhibitor, results were fitted by linear regression, yielding the slope  $0.046 \text{ mmol l}^{-1} \text{ RBC min}^{-1} (\text{mmol l}^{-1})^{-1}$ .

component of the transport. The rates of this PCMBS-insensitive transport for both lactate and pyruvate as a function of external substrate concentrations are almost equal [ $0.034$  and  $0.046 \text{ mmol l}^{-1} \text{ RBC min}^{-1} (\text{mmol l}^{-1})^{-1}$ , respectively].

It is obvious from Figs 5 and 6 that, under resting physiological conditions, lactate and pyruvate are mainly transported into the red blood cell *via* the monocarboxylate carrier. At higher extracellular concentrations, such as occur after exercise, at least for lactate (e.g. Jensen *et al.* 1983), the ‘diffusional’ component becomes increasingly important in relative terms. The diffusional component may include a contribution from the anion exchange pathway, as in other vertebrate red blood cells (Deuticke *et al.* 1978, 1982; Deuticke, 1989), since pyruvate transport in PCMBS-containing medium is further inhibited by approximately 10% by  $0.1 \text{ mmol l}^{-1}$  DIDS at a pyruvate concentration of  $0.05 \text{ mmol l}^{-1}$  (K. Tiihonen, unpublished results).

The present results differ from those reported for lactate uptake in tuna red blood cells (Moon *et al.* 1987), which suggested that tuna red blood cells lack a lactate-transporting system. The difference may, however, be mainly methodological. If there were a carrier-mediated lactate transport system in tuna red blood cells with properties similar to that found in carp, its contribution to total flux of lactate would be difficult to detect using the relatively high concentration range ( $1\text{--}30 \text{ mmol l}^{-1}$ ) or long incubation times (3min) of Moon *et al.* (1987), which preclude the estimation of a true initial uptake rate.



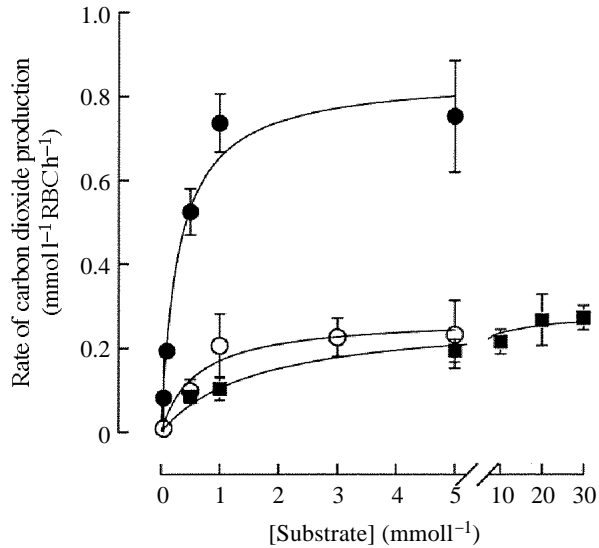

Fig. 7. Effects of substrate concentration on carbon dioxide production rates from L-lactate (squares; mean  $\pm$  S.E.M.,  $N=4-5$ ) and pyruvate (circles) by carp red blood cells. Filled circles (mean  $\pm$  S.E.M.,  $N=4$ ) describe the pyruvate oxidation in a group of carp that had been maintained in laboratory conditions for 1 year. Open circles (mean  $\pm$  S.E.M.,  $N=2-7$ ) are from a group taken from the fisheries station 10 days to 2 months before experimentation. Apparent  $K_m$  and  $V_{max}$  values (determined from the Michaelis-Menten equation) are: lactate,  $1.71 \text{ mmol l}^{-1}$  and  $0.276 \text{ mmol CO}_2 \text{ l}^{-1} \text{ RBC h}^{-1}$ ; pyruvate (filled circles),  $0.29 \text{ mmol l}^{-1}$  and  $0.848 \text{ mmol CO}_2 \text{ l}^{-1} \text{ RBC h}^{-1}$ ; pyruvate (open circles),  $0.62 \text{ mmol l}^{-1}$  and  $0.275 \text{ mmol CO}_2 \text{ l}^{-1} \text{ RBC h}^{-1}$ .

Table 1. Comparison between the uptake and oxidation rates of L-lactate and pyruvate at various extracellular concentrations by carp red blood cells

| Substrate | Extracellular concentration ( $\text{mmol l}^{-1}$ ) | Uptake rate ( $\text{mmol l}^{-1} \text{ RBC h}^{-1}$ ) | Oxidation rate ( $\text{mmol l}^{-1} \text{ RBC h}^{-1}$ ) |
|-----------|------------------------------------------------------|---------------------------------------------------------|------------------------------------------------------------|
| L-Lactate | 0.5                                                  | 3.90                                                    | 0.028                                                      |
|           | 1                                                    | 6.97                                                    | 0.034                                                      |
|           | 5                                                    | 21.76                                                   | 0.065                                                      |
|           | 10                                                   | 36.22                                                   | 0.072                                                      |
|           | 20                                                   | 46.98                                                   | 0.107                                                      |
| Pyruvate  | 0.05                                                 | 2.05                                                    | 0.003–0.027                                                |
|           | 0.1                                                  | 3.54                                                    | 0.012–0.064                                                |
|           | 0.5                                                  | 10.36                                                   | 0.032–0.175                                                |
|           | 1                                                    | 15.22                                                   | 0.069–0.246                                                |
|           | 5                                                    | 47.62                                                   | 0.078–0.251                                                |

Data are taken from the experiments described in Figs 5, 6 (uptake) and 7 (oxidation).

Oxidation rates were calculated from carbon dioxide production rates, assuming that 1 mol of lactate or pyruvate produces 3 mol of carbon dioxide.

The lower and upper values for pyruvate oxidation are taken from the two groups of carp.

Transport of monocarboxylates by two parallel transport systems, a monocarboxylate carrier and a band 3 anion exchanger, and also by non-ionic diffusion (see Deuticke, 1982, 1989), makes a detailed analysis difficult. These three pathways contribute to a varying extent depending on the experimental conditions, especially temperature, pH and, as the present study also shows, substrate concentration. Since most of the inhibitors of the band 3 anion exchange system also inhibit the monocarboxylate carrier (Deuticke *et al.* 1982; Jennings and Adams-Lackey, 1982; Poole and Halestrap, 1991), the contribution of the band 3 system of monocarboxylate transport is difficult to study. The nominally bicarbonate-free medium (Tris-buffered) used in the present experiments may have the effect of exaggerating the amount of monocarboxylate uptake *via* the band 3 system because of the decreased probability of bicarbonate ions entering the transport site.

The dependence of oxidation rates on L-lactate and pyruvate concentrations yields saturation kinetics, which are described in Fig. 7 by a Michaelis–Menten analysis. The utilization of lactate and pyruvate was much slower than their rate of transport into the erythrocytes at the same extracellular concentrations (Table 1). This indicates that if energy production from lactate and pyruvate is regulated to respond to varying metabolic needs, the controlling steps occur within the metabolic pathways. The  $K_m$  values for lactate and pyruvate ( $1.71\text{mmol l}^{-1}$  and  $0.29\text{--}0.62\text{mmol l}^{-1}$ , respectively) oxidation are lower than those for transport.

For pyruvate, apparent  $K_m$  values ( $0.29$  and  $0.62\text{mmol l}^{-1}$ ) as well as  $V_{\max}$  values ( $0.848$  and  $0.275\text{mmol CO}_2\text{l}^{-1}\text{RBC h}^{-1}$ ) depended on the carp group used. The variation between the carp groups may be explained by their acclimatization to different environments. The group that had been held in laboratory conditions for 1 year could utilize pyruvate more effectively than the group taken from the fisheries station 10 days to 2 months before experimentation. Omnivorous fish, such as carp, have considerable flexibility of feeding habit and possibly are also able to utilize different nutrients. For example, carp are able to adapt to the quantity, and apparently also to the type, of digestive carbohydrate in the diet (Buddington, 1987).

Since pyruvate concentrations in fish plasma do not exceed  $0.5\text{mmol l}^{-1}$  (Milligan and Wood, 1986), carp RBCs do not reach their maximal pyruvate oxidation rates *in vivo*. However, energy production from pyruvate may exceed that from lactate utilization at high physiological substrate concentrations (above  $0.1\text{mmol l}^{-1}$  for pyruvate and  $4\text{mmol l}^{-1}$  for lactate), although lactate appears to be the most important substrate for energy metabolism at low physiological concentrations ( $0.05\text{mmol l}^{-1}$  for pyruvate and  $1\text{mmol l}^{-1}$  for lactate).

Despite the similarity between the human and carp monocarboxylate carriers, there is a significant difference in their physiological role. Monocarboxylates taken up by carp RBCs can be used for aerobic energy production inside the cells (Wood *et al.* 1990; Walsh *et al.* 1990; Tiihonen and Nikinmaa, 1991), but in mammalian red blood cells the monocarboxylate carrier (Halestrap, 1976; Deuticke *et al.* 1978; Dubinsky and Racker, 1978) allows a net loss of lactate, produced by anaerobic glycolysis, to occur.

In conclusion, the present findings show that carp red blood cells have a specific transport system for lactate and pyruvate. At resting plasma concentrations, about 90% of

lactate and pyruvate transport across carp red cell membrane proceeds *via* the specific monocarboxylate carrier. Only 10% of the total transport under the conditions of this study occurs by free diffusion or *via* the anion exchanger. The results also show that the transport rates of lactate and pyruvate are considerably higher than those required for their maximal rate of oxidation. In salmonids, catecholamines may double the oxygen consumption/energy production of red blood cells (Ferguson and Boutilier, 1988). Even if such activation of metabolism occurred in carp red blood cells, lactate and pyruvate transport would provide the cells with a saturating amount of substrate. The rapid transport of lactate and pyruvate into carp red blood cells thus guarantees that substrate availability is not the rate-limiting factor for the oxidation of these substrates.

This study was supported by grants from The Emil Aaltonen Foundation and from the Academy of Finland.

### References

- BUDDINGTON, R. K. (1987). Does the natural diet influence the intestine's ability to regulate glucose absorption? *J. comp. Physiol.* **157**, 677–688.
- BUSHNELL, P. G., NIKINMAA, M. AND OIKARI, A. (1985). Metabolic effects of dehydroabietic acid on rainbow trout erythrocytes. *Comp. Biochem. Physiol.* **81C**, 391–394.
- DEUTICKE, B. (1982). Monocarboxylate transport in erythrocytes. *J. Membr. Biol.* **70**, 89–103.
- DEUTICKE, B. (1989). Monocarboxylate transport in red blood cells: kinetics and chemical modification. In *Methods in Enzymology*, vol. 173, pp. 300–329. New York: Academic Press.
- DEUTICKE, B., BEYER, E. AND FORST, B. (1982). Discrimination of three parallel pathways of lactate transport in the human erythrocyte membrane by inhibitors and kinetic properties. *Biochim. biophys. Acta* **684**, 96–110.
- DEUTICKE, B., RICKERT, I. AND BEYER, E. (1978). Stereoselective, SH-dependent transfer of lactate in mammalian erythrocytes. *Biochim. biophys. Acta* **507**, 137–155.
- DUBINSKY, W. P. AND RACKER, E. (1978). The mechanism of lactate transport in human erythrocytes. *J. Membr. Biol.* **44**, 25–36.
- EDDY, F. B. (1977). Oxygen uptake by rainbow trout blood, *Salmo gairdneri*. *J. Fish Biol.* **10**, 87–90.
- FERGUSON, R. A. AND BOUTILIER, R. G. (1988). Metabolic energy production during adrenergic pH regulation in red cells of the Atlantic salmon, *Salmo salar*. *Respir. Physiol.* **74**, 65–76.
- FERGUSON, R. A., TUFTS, B. L. AND BOUTILIER, R. G. (1989). Energy metabolism in trout red cells: consequences of adrenergic stimulation *in vivo* and *in vitro*. *J. exp. Biol.* **143**, 133–147.
- HALESTRAP, A. P. (1976). Transport of pyruvate and lactate into human erythrocytes. *Biochem. J.* **156**, 193–207.
- HALESTRAP, A. P. AND DENTON, R. M. (1974). Specific inhibition of pyruvate transport in rat liver mitochondria and human erythrocytes by  $\alpha$ -cyano-4-hydroxycinnamate. *Biochem. J.* **138**, 313–316.
- JENNINGS, M. L. AND ADAMS-LACKEY, M. (1982). A rabbit erythrocyte membrane protein associated with L-lactate transport. *J. biol. Chem.* **257**, 12866–12871.
- JENSEN, F. B., NIKINMAA, M. AND WEBER, R. E. (1983). Effects of exercise stress on acid–base balance and respiratory function in blood of the teleost *Tinca tinca*. *Respir. Physiol.* **51**, 291–301.
- MILLIGAN, C. L. AND WOOD, C. M. (1986). Tissue intracellular acid–base status and the fate of lactate after exhaustive exercise in the rainbow trout. *J. exp. Biol.* **123**, 123–144.
- MOON, T. W., BRILL, R. W., HOCHACHKA, P. W. AND WEBER, J.-M. (1987). L-(+)-Lactate translocation into the red blood cells of the skipjack tuna (*Katsuwonus pelamis*). *Can. J. Zool.* **65**, 2570–2573.
- POOLE, R. C. AND HALESTRAP, A. P. (1991). Reversible and irreversible inhibition, by stilbenedisulphonates, of lactate transport into rat erythrocytes. *Biochem. J.* **275**, 307–312.
- SALAMA, A. AND NIKINMAA, M. (1988). The adrenergic responses of carp (*Cyprinus carpio*) red cells: effects of  $P_{O_2}$  and pH. *J. exp. Biol.* **136**, 405–416.
- SEPHTON, D. H., MACPHEE, W. L. AND DRIEDZIC, W. R. (1991). Metabolic enzyme activities, oxygen

- consumption and glucose utilization in sea raven (*Hemitripterus americanus*) erythrocytes. *J. exp. Biol.* **159**, 407–418.
- TIIHONEN, K. AND NIKINMAA, M. (1991). Substrate utilization by carp (*Cyprinus carpio*) erythrocytes. *J. exp. Biol.* **161**, 509–514.
- WALSH, P. J., WOOD, C. M., THOMAS, S. AND PERRY, S. F. (1990). Characterization of red blood cell metabolism in rainbow trout *J. exp. Biol.* **154**, 475–489.
- WOOD, C. M., WALSH, P. J., THOMAS, S. AND PERRY, S. F. (1990). Control of red blood cell metabolism in rainbow trout after exhaustive exercise. *J. exp. Biol.* **154**, 491–507.
- YOUNG, J. D. AND ELLORY, J. C. (1982). In *Red Cell Membranes: A Methodological Approach* (ed. J. C. Ellory and J. D. Young), pp.119–133. London, New York: Academic Press.
